# Supplementary material for: Assembly and analysis of a male sterile rubber tree mitochondrial genome reveals DNA rearrangement events and a novel transcript
Source: PubMed Central journal article supplement (PMC3925788; doi:10.1186/1471-2229-14-45), 2014-02-10
Supplement: 1471-2229-14-45-S1.pdf [file 1471-2229-14-45-S1.pdf]

## Supplementary file 1

We designed primers to each of the contig ends (table S1.1), then performed PCR using these primers to confirm each of the contig joins that make up the master circle (figure S1.1, figure S1.2 and figure S1.3). The master circle was constructed using the contig graph (figure S1.4) such that all contigs were covered at least once.

**Table S1.1:** Primers used to confirm contig joins in the master circle

| Primer names                  | Primer pair number | Sequence                                        | Tm | Expected amplicon size (bp) | Connection    |
|-------------------------------|--------------------|-------------------------------------------------|----|-----------------------------|---------------|
| mtHv_ct1_L<br>mtHv_ct2_R      | 1                  | CTTTCCTGAGGTTGAAGTTG<br>TTCTATGGGAAATTGGAAACG   | 55 | 1124                        | c00001-c00002 |
| mtHv_ct2_L<br>mtHv_ct800_R    | 2                  | AATTGCACCAGTCTTTCATGC<br>GTTCAATTTCAATCGTGCCAGT | 55 | 980                         | c00002-c00800 |
| mtHv_ct800_L<br>mtHv_ct3_R    | 3                  | GAGGATTTACAGTCCCAGATGC<br>ACTTCCATGAGCAGAAAGAGC | 55 | 381                         | c00800-c00003 |
| mtHv_ct3_L<br>mtHv_ct38_R     | 4                  | GTGAGGCAATGAAGAATTGGA<br>AGGAGATGTGCCCCATAAAGA  | 55 | 279                         | c00003-c00038 |
| mtHv_ct38_L<br>mtHv_ct21_R    | 5                  | AAGGGCTTCCTATTCCTCCAT<br>GCCTTTGCTTTTCTAAGGACA  | 55 | 576                         | c00038-c00021 |
| mtHv_ct21_L<br>mtHv_ct1565_R  | 6                  | CCAGAAAAGAAAGGTCGACTG<br>ATGCCCCATTGACTTCTCTCT  | 55 | 488                         | c00021-c01565 |
| mtHv_ct1565_L<br>mtHv_ct352_R | 7                  | TAAACTAAGCCGAAGCACAGG<br>CCGGAAGTACGCCATAAAGTA  | 55 | 328                         | c01565-c00352 |
| mtHv_ct352_L<br>mtHv_ct20_R   | 8                  | TCCCTTATCCAGTTGATGCAG<br>GTAATGCATGAAGCGGAGTCT  | 55 | 193                         | c00352-c00020 |
| mtHv_ct20_L<br>mtHv_ct400_R   | 9                  | GAGCTTATCAACGACACTCTGG<br>CATGTGTTAGGTTCTCGTTGC | 55 | 326                         | c00020-c00400 |
| mtHv_ct400_L<br>mtHv_ct86_R   | 10                 | CAAGATCCGAACAACAAGGAG<br>AAGTCATGAGCGATAGCGAAG  | 55 | 201                         | c00400-c00086 |
| mtHv_ct86_L<br>mtHv_ct30_R    | 11                 | TTCATTCGGCCCTGTAGTTAG<br>TCTGGATGGCTCTCATAATCC  | 55 | 1066                        | c00086-c00030 |

|                               |    |                                                  |    |      |               |
|-------------------------------|----|--------------------------------------------------|----|------|---------------|
| mtHv_ct30_L<br>mtHv_ct38_R    | 12 | TACAGAGGACAGAGGTGAAGGA<br>AGGAGATGTGCCCCATAAAGA  | 55 | 287  | c00030-c00038 |
| mtHv_ct38_L<br>mtHv_ct37_R    | 13 | AAGGGCTTCCTATTCCTCCAT<br>GGATACCAAGGATGGAGACAA   | 55 | 358  | c00038-c00037 |
| mtHv_ct37_L<br>mtHv_ct9453_R  | 14 | TAGACTCCAAACCTGCCAATC<br>TTAGCAAGGTAAGCCCCATCT   | 55 | 670  | c00037-c09453 |
| mtHv_ct9453_L<br>mtHv_ct493_R | 15 | AAAGAAGGCAGGGAATCACAG<br>CAACCGGCCATAGTGAACCTTA  | 55 | 258  | c09453-c00493 |
| mtHv_ct493_L<br>mtHv_ct19_R   | 16 | TCTCAGTCAAATCGAGGGTTG<br>GACACATCCCATTGCACTGAT   | 55 | 252  | c00493-c00019 |
| mtHv_ct19_L<br>mtHv_ct1565_L  | 17 | GCATCGGATAGAAAGAGATCG<br>TAAACTAAGCCGAAGCACAGG   | 55 | 574  | c00019-c01565 |
| mtHv_ct1565_R<br>mtHv_ct18_R  | 18 | ATGCCCCATTGACTTCTCTCT<br>TCATACCTTCCCTTCCTTGCT   | 55 | 554  | c01565-c00018 |
| mtHv_ct18_L<br>mtHv_ct17_R    | 19 | GACCGGTTTTCTTTGCTATC<br>TCCCTTCTGAAGAGTCATTGC    | 55 | 248  | c00018-c00017 |
| mtHv_ct17_L<br>mtHv_ct11_R    | 20 | TGACAAGCGGATGAGTTTTCT<br>TGATAAGTAGGCGCTGCAGTT   | 55 | 435  | c00017-c00011 |
| mtHv_ct11_L<br>mtHv_ct86_L    | 21 | GGACCAAGAAGTGTTTGAAGG<br>TTCATTTCGGCCCTGTAGTTAG  | 55 | 983  | c00011-c00086 |
| mtHv_ct400_R<br>mtHv_ct4_R    | 22 | CATGTGTTAGGTTCTCGTTGC<br>TGATTAGTTCAAGACTGGACAGG | 55 | 257  | c00400-c00004 |
| mtHv_ct4_L<br>mtHv_ct5_R      | 23 | TCCCAACATCATTCTCAAACA<br>AGCCGTCTAAAGAAAGGCGTA   | 55 | 970  | c00004-c00005 |
| mtHv_ct5_L<br>mtHv_ct6_R      | 24 | TCAAGGAGAGTTTGACCATCC<br>CCGATTGGTTGTGAGTGTCTT   | 55 | 924  | c00005-c00006 |
| mtHv_ct6_L<br>mtHv_ct12_R     | 25 | CTCTCGGATTGTTGAAGAAGG<br>TGGAGATTTGTAGCATCATTCA  | 55 | 1313 | c00006-c00012 |

|                               |    |                                                 |    |      |               |
|-------------------------------|----|-------------------------------------------------|----|------|---------------|
| mtHv_ct12_L<br>mtHv_ct25668_R | 26 | TTGGACTGTGAACGAATTTCA<br>GACGCTTTCTCGAATCTTCAC  | 55 | 666  | c00012-c25668 |
| mtHv_ct25668_L<br>mtHv_ct22_R | 27 | GGCTAGAAATCCGTCATTAGC<br>TCTTAGTCCTACCGCTTTCCA  | 55 | 247  | c25668-c00022 |
| mtHv_ct22_L<br>mtHv_ct12_R    | 28 | GCTCAAGCCTATTCCATTTC<br>TGGAGATTTGTAGCATCATTCA  | 55 | 876  | c00022-c00012 |
| mtHv_ct25668_L<br>mtHv_ct23_R | 29 | GGCTAGAAATCCGTCATTAGC<br>AAGTGAAAGAAGCCCACAGAC  | 55 | 234  | c25668-c00023 |
| mtHv_ct23_L<br>mtHv_ct29_R    | 30 | TTGAATCTGCTGACAGTGAGG<br>GATAATGATGAGCCCCGTGTA  | 55 | 579  | c00023-c00029 |
| mtHv_ct29_L<br>mtHv_ct24_R    | 31 | TAACTCCGGCTGCAAGTCTAA<br>TAAGCAGGAGAATCACGAAGG  | 55 | 331  | c00029-c00024 |
| mtHv_ct24_L<br>mtHv_ct29_R    | 32 | CTGAACGTGCCAAGGAAATAG<br>GATAATGATGAGCCCCGTGTA  | 55 | 327  | c00024-c00029 |
| mtHv_ct29_L<br>mtHv_ct15_R    | 33 | TAACTCCGGCTGCAAGTCTAA<br>CTTGCACCAATCAAATCCACT  | 55 | 238  | c00029-c00015 |
| mtHv_ct15_L<br>mtHv_ct493_L   | 34 | AGACTGGTCTTGCGAAGATGT<br>TCTCAGTCAAATCGAGGGTTG  | 55 | 362  | c00015-c00493 |
| mtHv_ct493_R<br>mtHv_ct16_R   | 35 | CAACCGGCCATAGTGA ACTTA<br>TATTAGGGATTGGGGATCACA | 55 | 235  | c00493-c00016 |
| mtHv_ct16_L<br>mtHv_ct400_L   | 36 | CAGATCAAGTCTGACCGAAATC<br>CAAGATCCGAACAACAAGGAG | 55 | 419  | c00016-c00400 |
| mtHv_ct20_R<br>mtHv_ct279_R   | 37 | GTAATGCATGAAGCGGAGTCT<br>CCCGGCCTTAAAAGACAGAT   | 55 | 189  | c00020-c00279 |
| mtHv_ct279_L<br>mtHv_ct800_L  | 38 | TGCCTACGATCCTTTCTGACT<br>GAGGATTTACAGTCCCAGATGC | 55 | 354  | c00279-c00800 |
| mtHv_ct2_R<br>mtHv_ct333_R    | 39 | TTCTATGGGAAATTGGAAACG<br>GAAAGAGAAGGTTGCCAGTT   | 55 | 1093 | c00002-c00333 |

|              |    |                       |    |     |               |
|--------------|----|-----------------------|----|-----|---------------|
| mtHv_ct333_L | 40 | AAGAAAGCTTCTGCCCTCTTG | 55 | 296 | c00333-c00017 |
| mtHv_ct17_R  |    | TCCCTTCTGAAGAGTCATTGC |    |     |               |
| mtHv_ct17_L  | 41 | TGACAAGCGGATGAGTTTTCT | 55 | 439 | c00017-c00001 |
| mtHv_ct1_R   |    | CATGGATTCCTACGAAAGAGG |    |     |               |

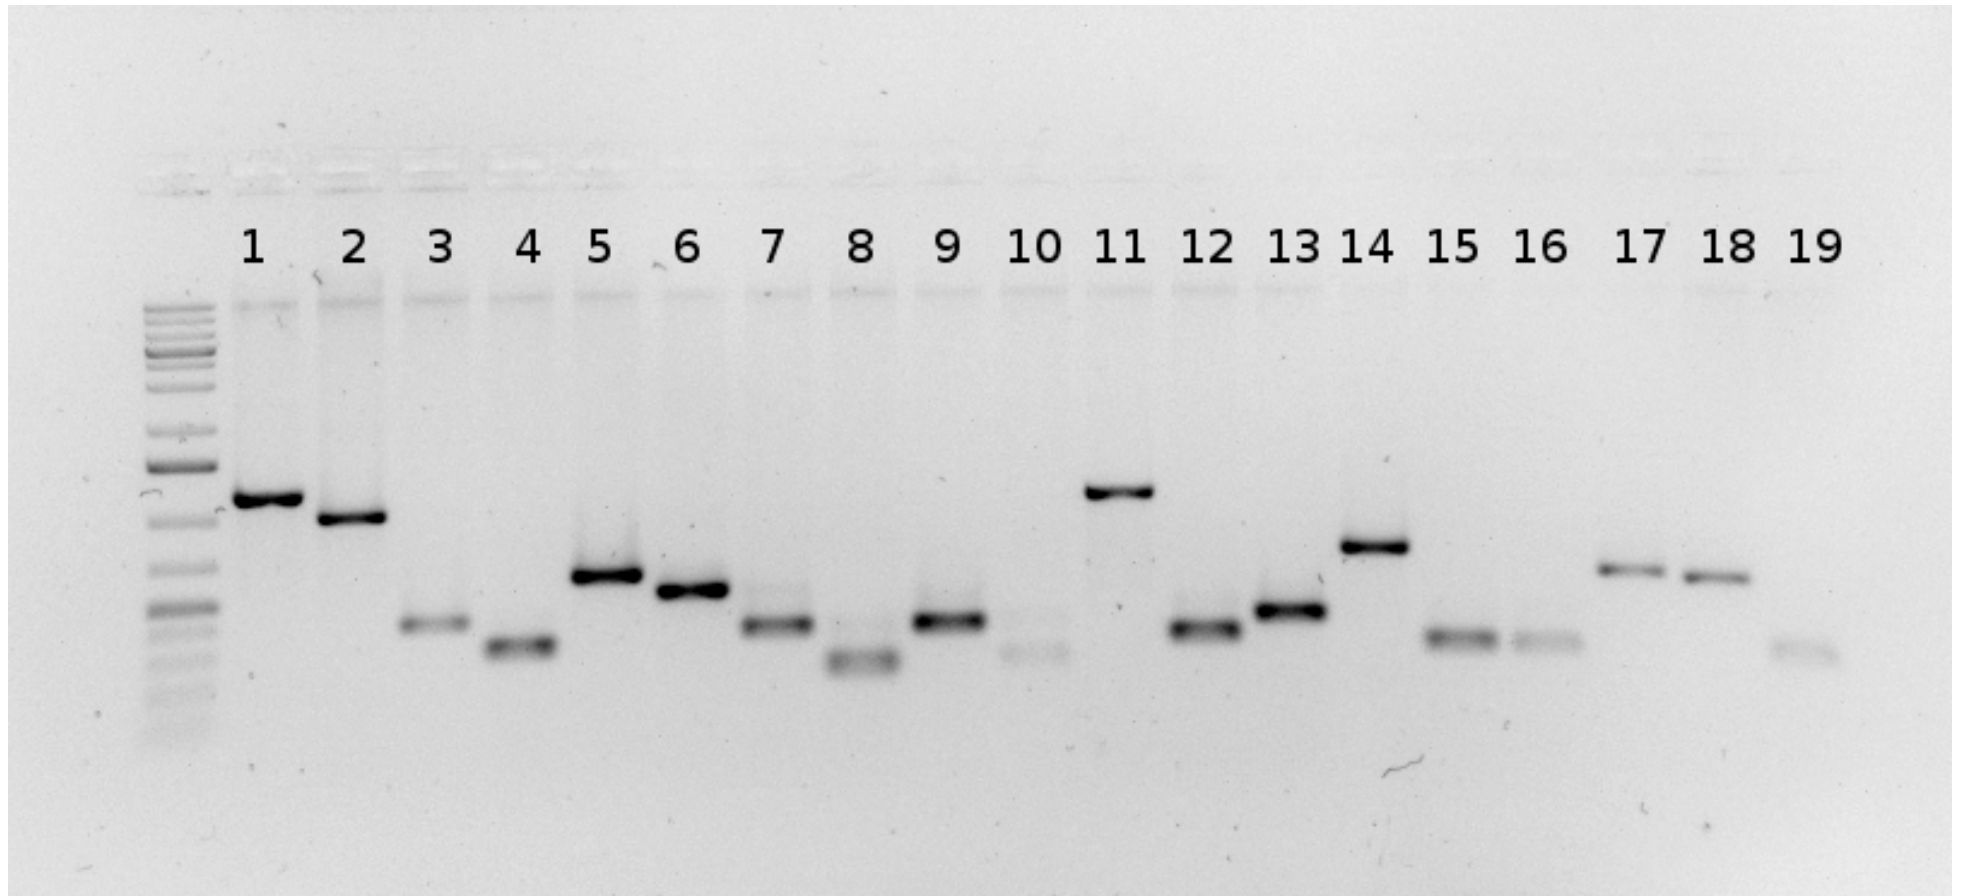

**Figure S1.1:** PCR products confirming master circle contig joins of primer pairs 1-19 from table S1.1. The DNA ladder is the Fermentas 1 kb plus generuler.

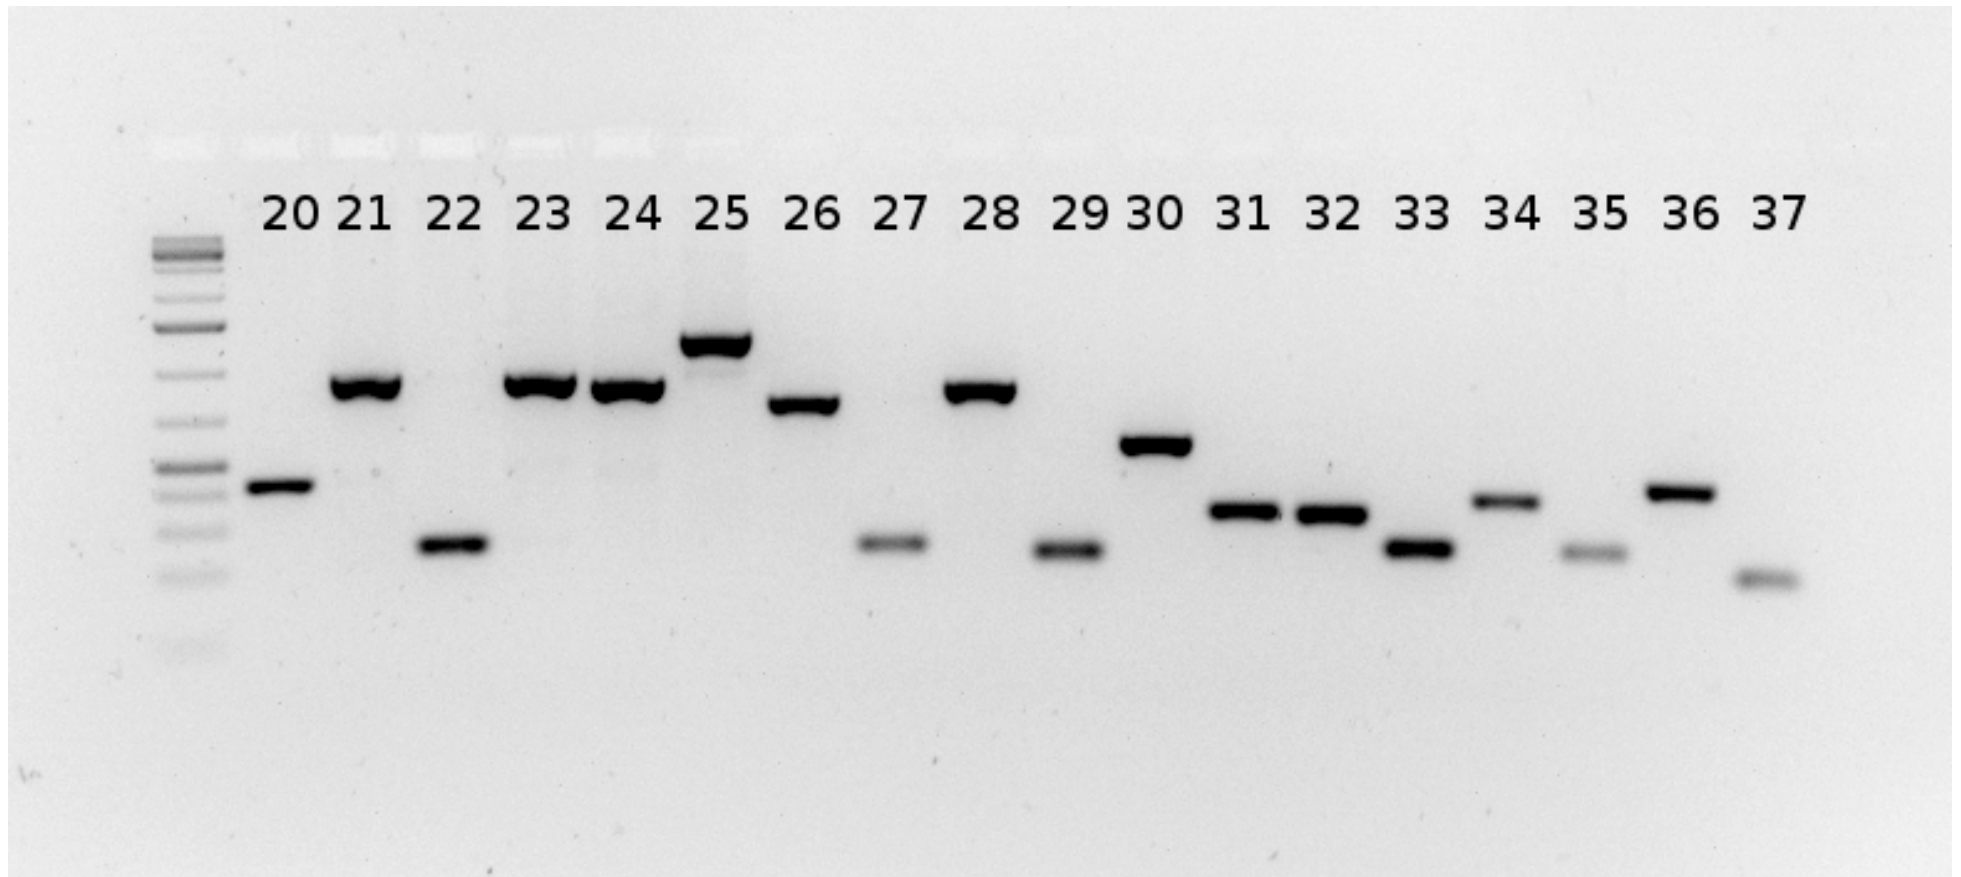

**Figure S1.2:** PCR products confirming master circle contig joins of primer pairs 20-37 from table S1.1. The DNA ladder is the Fermentas 1 kb plus generuler.

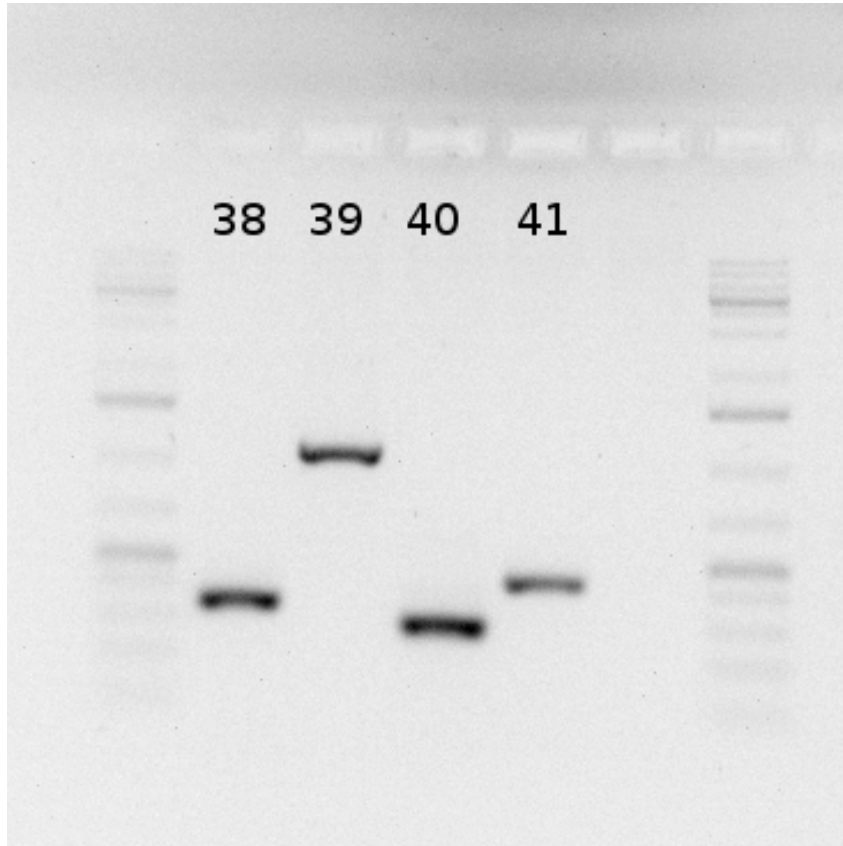

**Figure S1.3:** PCR products confirming master circle contig joins of primer pairs 38-41 from table S1.1. The DNA ladder is the Fermentas 1 kb plus generuler.

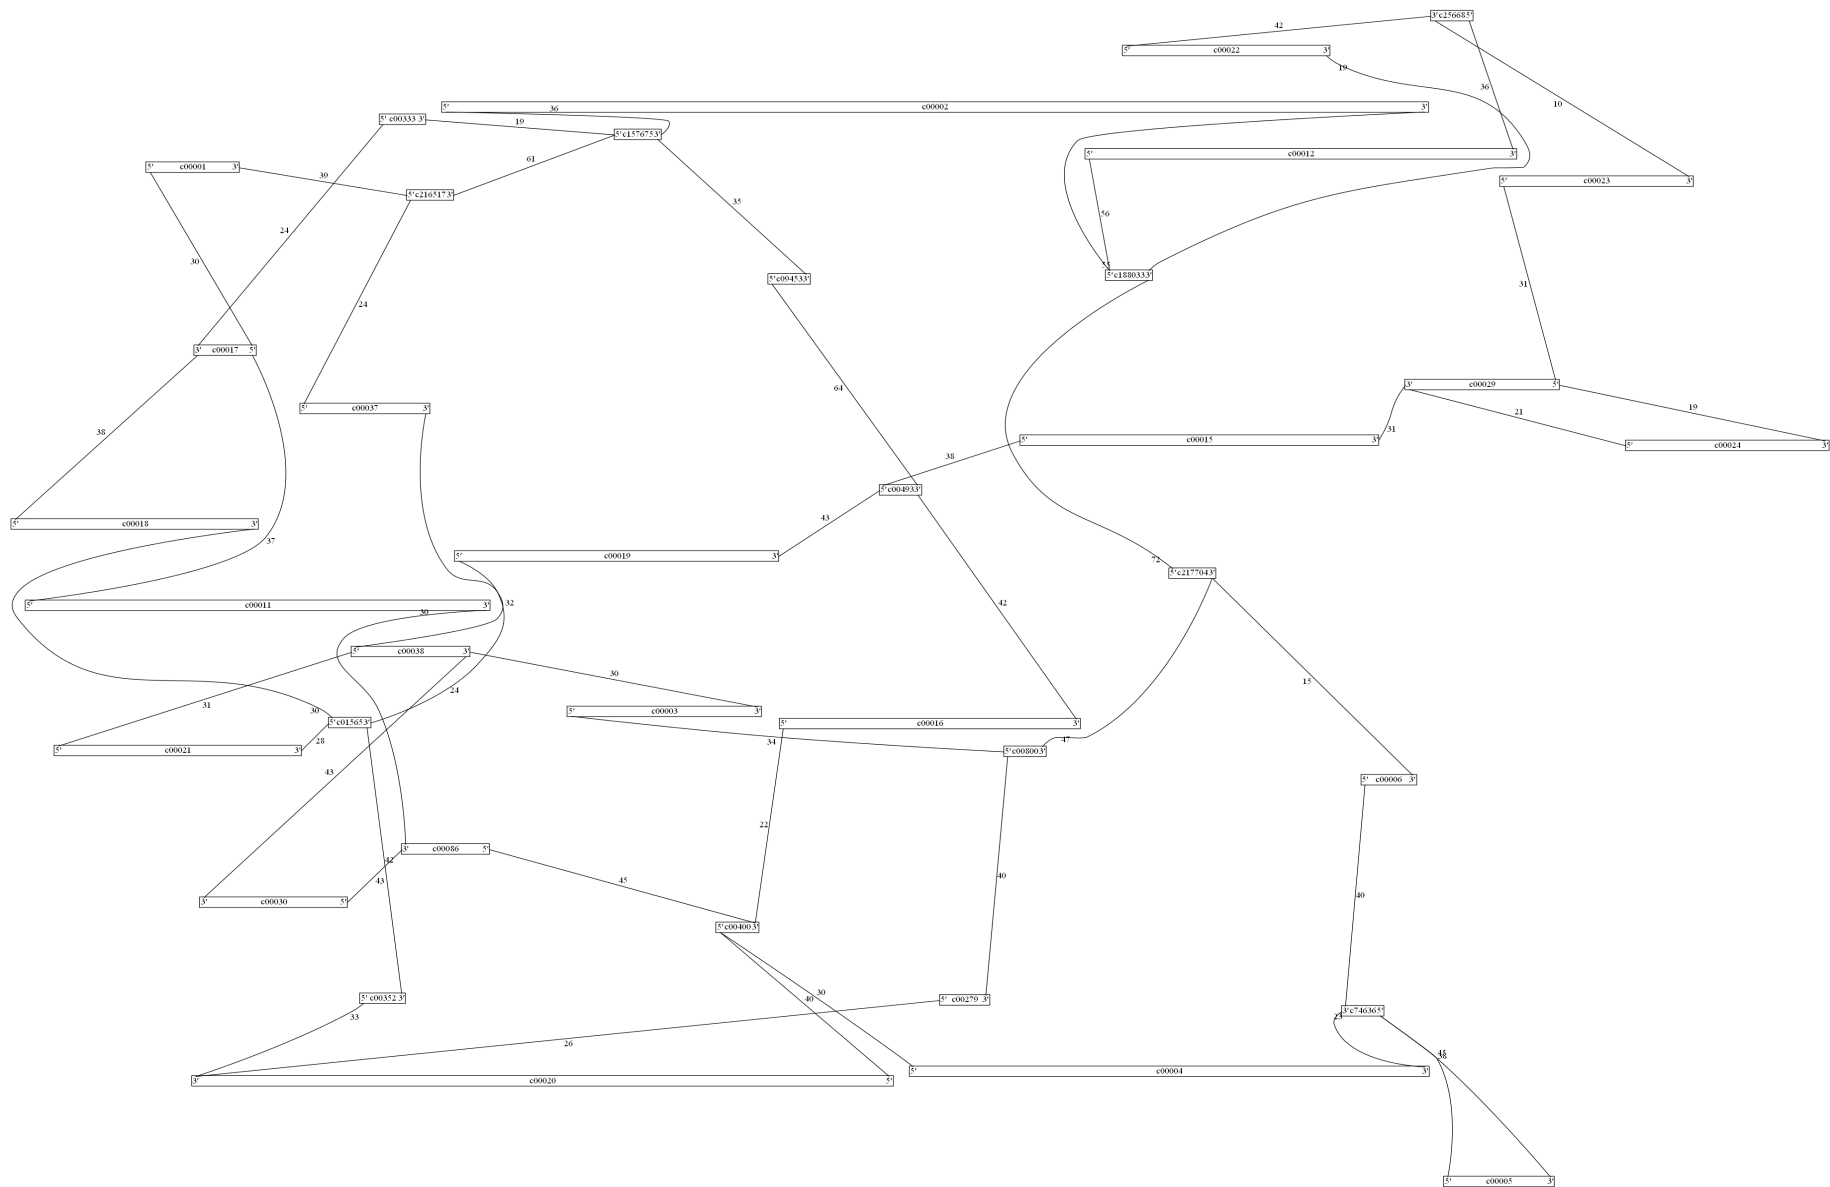

**Figure S1.4:** Scaffold graph showing 5' and 3' edges. The numbers indicate the number of supporting reads for each contig join.
